# Supplementary material
Source: PubMed Central journal article supplement (PMC4321232)
Supplement: pnas.201414183SI.pdf [file pnas.201414183SI.pdf]

# Supporting Information

Pliatsikas et al. 10.1073/pnas.1414183112

**Table S1. Demographics of the L2 group**

| ID   | Age, y | Sex    | Country of origin | Native language | Highest obtained educational level | U.K. residency, mo | Age of acquisition of L2 English, y | Place of L2 learning |
|------|--------|--------|-------------------|-----------------|------------------------------------|--------------------|-------------------------------------|----------------------|
| 101  | 31     | Male   | Greece            | Greek           | PhD                                | 99                 | 8                                   | School               |
| 103  | 31     | Male   | Italy             | Italian         | PhD                                | 86                 | 15                                  | School               |
| 105  | 30     | Female | China             | Mandarin        | PhD                                | 88                 | 12                                  | School               |
| 106  | 24     | Female | Poland            | Polish          | MSc/MA                             | 18                 | 6                                   | School               |
| 107  | 23     | Female | Greece            | Greek           | BSc/BA                             | 40                 | 8                                   | Home and school      |
| 108  | 34     | Female | Serbia            | Serbian         | PhD                                | 44                 | 6                                   | Home and school      |
| 109  | 27     | Female | France            | French          | MSc/MA                             | 34                 | 12                                  | School               |
| 110  | 47     | Female | Hong Kong         | Cantonese       | BSc/BA                             | 374                | 6                                   | School               |
| 111  | 20     | Male   | Bulgaria          | Bulgarian       | Undergraduate                      | 13                 | 10                                  | School               |
| 112  | 35     | Male   | Netherlands       | Dutch           | PhD                                | 102                | 11                                  | School               |
| 113  | 34     | Female | Poland            | Polish          | MSc/MA                             | 114                | 4                                   | School               |
| 114  | 31     | Female | France            | French          | Undergraduate                      | 144                | 15                                  | School               |
| 115  | 37     | Female | Poland            | Polish          | BSc/BA                             | 92                 | 18                                  | School               |
| 116  | 20     | Male   | Romania           | Romanian        | Undergraduate                      | 16                 | 13                                  | Home and school      |
| 119  | 27     | Female | Romania           | Romanian        | MSc/MA                             | 42                 | 5                                   | School               |
| 120  | 23     | Female | France            | French          | BSc/BA                             | 44                 | 13                                  | School               |
| 121  | 46     | Female | Germany           | German          | MSc/MA                             | 175                | 11                                  | School               |
| 123  | 41     | Female | Spain             | Spanish         | BSc/BA                             | 196                | 4                                   | School               |
| 124  | 43     | Male   | Uganda            | German          | PhD                                | 81                 | 10                                  | School               |
| 126  | 33     | Male   | Italy             | Italian         | PhD                                | 18                 | 16                                  | School               |
| Mean | 31.85  |        |                   |                 |                                    | 91.00              | 10.15                               |                      |
| SD   | 8.07   |        |                   |                 |                                    | 84.87              | 4.17                                |                      |

**Table S2. Demographics of the NS group**

| ID   | Age, y | Sex    | Highest obtained educational level |
|------|--------|--------|------------------------------------|
| 201  | 23     | Male   | BSc/BA                             |
| 202  | 24     | Male   | MSc/MA                             |
| 203  | 23     | Male   | BSc/BA                             |
| 204  | 28     | Female | MSc/MA                             |
| 205  | 30     | Female | PhD                                |
| 206  | 24     | Female | MSc/MA                             |
| 207  | 26     | Male   | PhD                                |
| 208  | 32     | Male   | PhD                                |
| 209  | 25     | Male   | MSc/MA                             |
| 210  | 24     | Male   | BSc/BA                             |
| 211  | 23     | Female | MSc/MA                             |
| 212  | 22     | Female | MSc/MA                             |
| 213  | 22     | Female | MSc/MA                             |
| 214  | 31     | Male   | PhD                                |
| 215  | 39     | Female | BSc/BA                             |
| 216  | 33     | Male   | MSc/MA                             |
| 217  | 37     | Male   | PhD                                |
| 218  | 34     | Female | MSc/MA                             |
| 219  | 31     | Female | BSc/BA                             |
| 220  | 32     | Female | PhD                                |
| 221  | 23     | Male   | BSc/BA                             |
| 222  | 34     | Female | MSc/MA                             |
| 223  | 33     | Female | PhD                                |
| 224  | 31     | Female | Undergraduate                      |
| 225  | 20     | Female | BSc/BA                             |
| Mean | 28.16  |        |                                    |
| SD   | 5.33   |        |                                    |
